# Supplementary material
Source: PubMed Central journal article supplement (PMC4680473)
Supplement: ijcep0008-13267-f3.pdf [file ijcep0008-13267-f3.pdf]

## Survivin and colorectal cancer

**Supplementary Table 1.** List of primer sequences

| Gene name | Primer direction | Primer sequence (5'-3') |
|-----------|------------------|-------------------------|
| GAPDH     | F                | AAGGTCGGTGTGAACGGATT    |
|           | R                | AGATGATGACCCTTTTGGCTC   |
| survivin  | F                | GAGGCTGGCTTCATCCACTG    |
|           | R                | CTTTTGCTTGTTGTTGGTCTCC  |
| ki67      | F                | GGACACCAGAGACCATGCAA    |
|           | R                | CCACGAGTTACCCTTGGCTT    |
| bcl2      | F                | GTTGGGATTCTACGGATTGA    |
|           | R                | AATGCTGAAAGGTGAAGAGGC   |
